# Supplementary material
Source: PubMed Central journal article supplement (PMC5482081)

SUPPLEMENTARY DATA

Supplementary Table 1.

Antibodies

| Antibody          | Host              | Dilution for WB | Dilution for IHC | Dilution for IF | Company                                                                                              |
|-------------------|-------------------|-----------------|------------------|-----------------|------------------------------------------------------------------------------------------------------|
| hnRNP F           | Rabbit polyclonal | 1:10000         | 1:200            | 1:200           | specifically recognizing hnRNP F (CTARRYIGIVKQAGLER) were generated in our laboratory <sup>(1)</sup> |
| ACE-2             | Goat polyclonal   | 1 :2000         | 1 :100           |                 | R&D Systems                                                                                          |
| MasR (MAS1)       | Rabbit polyclonal | 1 :2000         | 1 :100           |                 | Novus Biologicals                                                                                    |
| ACE               | Goat polyclonal   | 1:2000          | 1:100            |                 | Santa Cruz Biotechnology                                                                             |
| TGFβ1             | Rabbit polyclonal | 1 :2000         | 1 :100           |                 | Santa Cruz Biotechnology                                                                             |
| AQP-1             | Mouse monoclonal  |                 |                  | 1:200           | Santa Cruz Biotechnology                                                                             |
| Catalase          | Rabbit polyclonal | 1 :2000         | 1 :200           |                 | Mybiosource                                                                                          |
| NADPH oxidase 4   | Rabbit monoclonal | 1 :2000         | 1 :100           |                 | Abcam                                                                                                |
| Fibronectin I     | Rabbit polyclonal | 1 :2000         | 1 :100           |                 | Sigma-Aldrich                                                                                        |
| Collagen type I   | Rabbit polyclonal |                 | 1 :100           |                 | Abcam                                                                                                |
| Agt               | Rabbit polyclonal | 1:2000          | 1:200            |                 | specifically recognizing Agt were generated in our laboratory <sup>(2)</sup>                         |
| Bax               | Mouse monoclonal  | 1 :2000         |                  |                 | Santa Cruz Biotechnology                                                                             |
| Bcl2              | Mouse monoclonal  | 1 :2000         |                  |                 | Santa Cruz Biotechnology                                                                             |
| β-Actin           | Mouse Monoclonal  | 1 :20000        |                  |                 | Sigma-Aldrich                                                                                        |
| Cleaved Caspase-3 | Rabbit polyclonal | 1 :1000         | 1 :100           |                 | Cell Signaling Technology                                                                            |
| Sirt1             | Mouse monoclonal  | 1 :2000         | 1 :100           |                 | Abcam                                                                                                |
| P53               | Mouse monoclonal  | 1 :2000         |                  |                 | Cell Signaling Technology                                                                            |
| P53 (acetyl K381) | Rabbit polyclonal | 1 :2000         | 1 :100           |                 | Abcam                                                                                                |
| Foxo3a            | Rabbit monoclonal | 1 :1000         | 1 :100           |                 | Cell Signaling Technology                                                                            |

(1)Wei CC, Guo DF, Zhang SL et al. Heterogeneous nuclear ribonucleoprotein F modulates angiotensinogen gene expression in rat kidney proximal tubular cells. J Am Soc Nephrol, 16:616–628, 2005.

(2)Wang L, Lei C, Zhang SL et al. Synergistic effect of dexamethasone and isoproterenol on the expression of angiotensinogen in immortalized rat proximal tubular cells. Kidney international, 53: 287-295, 1998.

SUPPLEMENTARY DATA

Supplementary Table 2.

Primers and siRNA

| Gene                  | Primer sequences                                            | Species      | Reference Sequence            |
|-----------------------|-------------------------------------------------------------|--------------|-------------------------------|
| hnRNP F               | S:AGAGTGACCGGAGAAGCTGA<br>AS:GCTCTCCAGGCCACTGTAAG           | Mouse<br>Rat | NM_133834.2<br>NM_001037286.1 |
| HA-tag                | AS:GGCGTAGTCAGGCACGTCGT                                     |              |                               |
| Leptin Receptor (WT)  | S:AGAACGGACACTCTTTGAAGTCTC<br>AS:ACCATAGTTTAGGTTTGTTTC      | Mouse        | NM_001122899.1                |
| Leptin Receptor (Mut) | S:AGAACGGACACTCTTTGAAGTCTC<br>AS:ACCATAGTTTAGGTTTGTTTA      | Mouse        | NM_001122899.1                |
| ACE                   | S:GACCGGACAGCCCAAGTG<br>AS:AGCTTCTTTATGATCCGCTTGATG         | Mouse        | NM_207624.5                   |
| ACE                   | S:GAGCCATCCTTCCCTTTTTTC<br>AS:GGCTGCAGCTCCTGGTATAG          | Rat          | NM_012544.1                   |
| Ace2                  | S:ATATGACTCAAGGATTCTGGG<br>AS:GCTGCAGAAAGTGACATGATT         | Mouse        | NM_001130513.1                |
| Ace2                  | S:GCCCAAAGATGAACGAGGC<br>AS:GACGCTTGATGGTCGCATTC            | Rat          | NM_001012006.1                |
| MasR                  | S:GCATTCGTCTGTGCCCTTCT<br>AS:TTCCGTATCTTCACCACCAAGA         | Mouse        | NM_008552.4                   |
| MasR                  | S:TTGACAGCGGAGAAGAGAGTCA<br>AS:TCCGTATCTTCACCACCAAGATG      | Rat          | NM_012757.2                   |
| TGF- $\beta$ 1        | S:CCAAACTAAGGCTCGCCAGTC<br>AS:GGCACTGCTTCCCGAATGTC          | Mouse        | NM_011577.1                   |
| TGF- $\beta$ 1        | S:ATACGCCTGAGTGGCTGTCT<br>AS:TGGGACTGATCCCATTGATT           | Rat          | NM_021578.2                   |
| Angiotensinogen       | S: CCACGCTCTCTGGATTTATC<br>AS: ACAGACACCGAGATGCTGTT         | Mouse        | NM_007428.3                   |
| Angiotensinogen       | S: CCTCGCTCTCTGGACTTATC<br>AS: CAGACACTGAGGTGCTGTTG         | Rat          | NM_134432.2                   |
| Nox1                  | S: GGTCACTCCCTTTGCTTCCA<br>AS: GGCAAAGGCACCTGTCTCTCT        | Mouse<br>Rat | NM_172203.2<br>NM_053683.1    |
| Nox2                  | S: CCCTTTGGTACAGCCAGTGAAGAT<br>AS: CAATCCCGGCTCCCACTAACATCA | Mouse<br>Rat | NM_007807.5<br>NM_023965.1    |
| Nox4                  | S: TGGCCAACGAAGGGGTTAAA<br>AS: GATGAGGCTGCAGTTGAGGT         | Mouse        | NM_015760.5                   |
| Nox4                  | S: TGGCCAACGAAGGGGTTAAA<br>AS: GATCAGGCTGCAGTTGAGGT         | Rat          | NM_053524.1                   |
| Catalase              | S: CGACCAGATGAAGCAGTGGGA<br>AS: CCACTCTCTCAGGAATCCGC        | Mouse<br>Rat | NM_012520.2<br>NM_009804.2    |
| Bax                   | S: GTTTCATCCAGGATCGAGCAG<br>AS: CATCTTCTTCCAGATGGTGA        | Mouse<br>Rat | NM_007527.3<br>NM_017059.2    |
| Bcl2                  | S: CTGTGGATGACTGAGTACC<br>AS: GAGACAGCCAGGAGAAAT            | Mouse<br>Rat | NM_009741.5<br>NM_016993.1    |
| Sirtuin-1             | S: GATCCTTCAGTGTGATGGTT<br>AS: GAAGACAATCTCTGGCTTCA         | Mouse        | NM_019812.3                   |
| Sirtuin-1             | S: CAGTGTGATGGTTCTTTGC<br>AS: CACCGAGGAACCTGAT              | Rat          | XM_006223877.2                |
| P53                   | S: ATGGAGGATTCACAGTCGGATA<br>AS: GACTTCTTGTAGATGGCCATGG     | Mouse<br>Rat | NM_011640.3<br>NM_030989.3    |
| Foxo3                 | S:GAGCTGGAGCTCGAACCTT<br>AS:CTTCATCGTCGTCCTCCTCG            | Mouse        | NM_019740.2                   |
| Foxo3                 | S: AACAGTACCGTGTTCGGACC<br>AS: AGTGTCTGGTTGCCGTAGTG         | Rat          | NM_001106395.1                |

SUPPLEMENTARY DATA

|                                                           |                                                                                                                                                                                                 |              |                                                                           |
|-----------------------------------------------------------|-------------------------------------------------------------------------------------------------------------------------------------------------------------------------------------------------|--------------|---------------------------------------------------------------------------|
| FN1                                                       | S:GGCCTGAACCAGCCTACAG<br>AS:TGAGCTTAAAGCCAGCGTCA                                                                                                                                                | Mouse        | NM_010233.2                                                               |
| FN1                                                       | S:GGGAAGAAAAGGAGCCAGG<br>AS:CCTCTTGCTCTTCCCGGTTT                                                                                                                                                | Rat          | NM_019143.2                                                               |
| Col1a1                                                    | S:ATCTCCTGGTGCTGATGGAC<br>AS:ACCTTGTTTGCCAGGTTCCAC                                                                                                                                              | Mouse        | NM_007742.3                                                               |
| β-actin                                                   | S:ATGCCATCCTGCGTCTGGAC<br>AS:AGCATTGCGGTGCACGATGG                                                                                                                                               | Mouse<br>Rat | NM_007393.3<br>NM_031144.2                                                |
| Rat Sirtuin-1 promoter                                    | S :ATACACTCGAGGATGGCTCAGCGGTTAAGAG<br>S :AGACACTCGAGGGTAGTGAGTTCAGGCCAGC<br>C<br>S : AGACACTCGAGTCGTTGCTACTTCATAACCG<br>S : GACACTCGAGTCGATCCTTCTCTTTCTCGG<br>AS ATATAAGCTTGTTGCCCGCCAGCTCACTGT | Rat          | (XhoI)-1360<br>(XhoI)-1027<br><br>(XhoI)-415<br>(XhoI)-201<br>(HindII)+84 |
| Rat Sirtuin-1 promoter hnRNP F binding element 1 (Mut)    | S:CTCTGTCTCAAAAAACAAAAAATTTAGCTCAG<br>TGGTAGAGCGCTTG<br>AS:CAAGCGCTCTACCACTGAGCTAAATTTTTTTGT<br>TTTTTTGAGACAGAG                                                                                 |              | Site directed mutagenesis primers                                         |
| Rat Sirtuin-1 promoter-hnRNP F-RE probe                   | S: AAAAGGGGGTTGGGGATTTA<br>AS: TAAATCCCAACCCCTTTT                                                                                                                                               |              | Biotinylated probe for EMSA                                               |
| hnRNP F-RE (WT)                                           | S: AAAAGGGGGTTGGGGATTTA<br>AS: TAAATCCCAACCCCTTTT                                                                                                                                               |              | Competitor                                                                |
| hnRNP F-RE (M1)                                           | S: AAAAaaaGGTTGGGGATTTA<br>AS: TAAATCCCAACCCttTTTT                                                                                                                                              |              | Competitor                                                                |
| hnRNP F-RE (M2)                                           | S: AAAAGGaaaTTGGGGATTTA<br>AS: TAAATCCCAAtttCCTTTT                                                                                                                                              |              | Competitor                                                                |
| hnRNP F-RE (M3)                                           | S: AAAAGGGGGTTaaGGATTTA<br>AS: TAAATCCttAACCCCTTTT                                                                                                                                              |              | Competitor                                                                |
| hnRNP F-RE (M4)                                           | S: AAAAGGGGGTTGGaaATTTA<br>AS: TAAATttCCAACCCCTTTT                                                                                                                                              |              | Competitor                                                                |
| ON-TARGET plus SMARTpool siRNA J-094699-09, Rat Sirtuin-1 | CCUCAAGCCAUGUUCGAUA                                                                                                                                                                             | Rat          | siRNA                                                                     |
| ON-TARGET plus SMARTpool siRNA J-094699-10, Rat Sirtuin-1 | CCACCUGAGUUGGAUGAUA                                                                                                                                                                             | Rat          | siRNA                                                                     |
| ON-TARGET plus SMARTpool siRNA J-094699-11, Rat Sirtuin-1 | CAGAACCACCAAAGCGGAA                                                                                                                                                                             | Rat          | siRNA                                                                     |
| ON-TARGET plus SMARTpool siRNA J-094699-12, Rat Sirtuin-1 | CACCGAUCCUCGAACAAUU                                                                                                                                                                             | Rat          | siRNA                                                                     |
| hnRNPF siRNA (ID:s133896)                                 | S:CAUGCAGCACAGAUACAUAAtt<br>AS:UAUGUAUCUGUGCUGCAUGtt                                                                                                                                            | Rat          | siRNA                                                                     |

SUPPLEMENTARY DATA

Supplementary Table 3.

Physiological measurements

|                                                           | db/m<br>(n=10) | db/m<br><i>hnRNP F-Tg</i><br>(n=10) | db/db<br>(n=10) | db/db<br><i>hnRNP F-Tg</i><br>(n=10) |
|-----------------------------------------------------------|----------------|-------------------------------------|-----------------|--------------------------------------|
| Blood glucose (mmol/l)                                    | 9.2±0.38       | 8.8±0.36                            | 30.5±1.04**     | 30.9±0.92**                          |
| Systolic blood pressure (mmHg)                            | 118.7±2.03     | 117.8±2.34                          | 124.9±2.32*     | 116.8±1.58†                          |
| Kidney weight (mg)                                        | 320.5±11.16    | 333.9±12.46                         | 460.9±8.44**    | 427.1±16.77*,†                       |
| Body weight (g)                                           | 30.17±0.83     | 30.4±0.62                           | 52.0±1.88**     | 50.1±2.34**                          |
| Tibial length (mm)                                        | 22.1±0.18      | 22.0±0.16                           | 21.4±0.17       | 21.3±0.13                            |
| Kidney weight/body weight ratio                           | 10.6±0.27      | 11.0±0.39                           | 8.7±0.22*       | 8.7±0.55*                            |
| Kidney weight/tibial length ratio                         | 14.5±0.49      | 15.1±0.55                           | 21.3±0.51**     | 18.4±1.83†                           |
| GFR (μl min <sup>-1</sup> )                               | 295.9±23.43    | 408.2±26.48                         | 721.2±96.08**   | 703.7±55.78**                        |
| GFR/BW (μl min <sup>-1</sup> g <sup>-1</sup> )            | 10.0±0.84      | 12.4±0.88                           | 15.7±2.68       | 13.6±1.16                            |
| Urinary ACR (μg/mg)                                       | 33.7±5.39      | 45.1±9.53                           | 353.3±23.35**   | 281.5±34.26**,†                      |
| Urinary Agt/Cre ratio (ng/mg)                             | 65.1±11.14.    | 48.4±8.59                           | 349.4±52.74**   | 208.5±28.6**,†                       |
| Urinary Ang II/Cre ratio (ng/mg)                          | 0.05±0.011     | 0.05±0.007                          | 0.93±0.157**    | 0.54±0.060**,†                       |
| Urinary Ang 1-7/Cre ratio (ng/mg)                         | 1.47±0.158     | 1.39±0.177                          | 0.84±0.054*     | 1.34±0.206†                          |
| Glomerular tuft volume (10 <sup>3</sup> μm <sup>3</sup> ) | 133.3±4.63     | 137.4±4.16                          | 238.2±8.60**    | 218.5±8.69**                         |
| RPTC volume (10 <sup>3</sup> mm <sup>3</sup> )            | 4.0±0.09       | 4.0±0.09                            | 8.1±0.22**      | 5.6±0.11**,††                        |

All data are expressed as means ± SEM.

\**p*<0.05, \*\**p*<0.01 compared with db/m; †*p*<0.05, ††*p*<0.01 compared with db/db mice

SUPPLEMENTARY DATA

Supplementary Table 4.

Patient Characteristics

| Pt's I.D.#                         | a                        | b                          | c                    | d                    |
|------------------------------------|--------------------------|----------------------------|----------------------|----------------------|
| Diabetes (Y/N)                     | No                       | No                         | Yes                  | Yes                  |
| Age (y)                            | 57                       | 54                         | 53                   | 48                   |
| Sex (M/F)                          | M                        | F                          | M                    | M                    |
| Serum creatinine (mg/dL)           | 0.85                     | 0.84                       | 1.02                 | 0.96                 |
| Serum glucose (mg/dL)              | 115.3                    | 92.0                       | 195.6                | 181.0                |
| Urine glucose (mmol/L)             | 0                        | 0                          | 3                    | 0                    |
| Urine protein (g/L) <sup>(1)</sup> | 0                        | 0                          | 0                    | 0                    |
| GFR (mL/min) <sup>(2)</sup>        | 90                       | 75                         | 81                   | 89                   |
| Known drugs used                   | Atorvastatin, Bisoprolol | None                       | *                    | **                   |
| Hypertension (Y/N)                 | Y                        | N                          | Y                    | Y                    |
| Diagnosis                          | Clear cell carcinoma     | Epithelioid angiomyolipoma | Clear cell carcinoma | Clear cell carcinoma |

(1) Urine protein is determined on dipstick.

(2) GFR is calculated with MDRD equation.

\*Diuretic, Angiotensin Receptor Blocker, Antineoplastic Agent, Oral Hypoglycemic Agent, Beta-Blockers, Calcium Channel Blockers.

\*\*Angiotensin Receptor Blocker, Oral Hypoglycemic Agent, Calcium Channel Blockers.

SUPPLEMENTARY DATA

Supplementary Table 5.

Patient Characteristics

| Pt's I.D.#                         | e                            | f                    | g                           | h                     |
|------------------------------------|------------------------------|----------------------|-----------------------------|-----------------------|
| Diabetes (Y/N)                     | No                           | No                   | Yes                         | Yes                   |
| Age (y)                            | 64                           | 64                   | 65                          | 74                    |
| Sex (M/F)                          | M                            | M                    | M                           | M                     |
| Serum creatinine (mg/dL)           | 1.5                          | 0.8                  | 1.1                         | 1.1                   |
| Serum glucose (mg/dL)              | 105                          | 97                   | 200                         | 151                   |
| Urine glucose (mmol/L)             | Negative                     | Negative             | 56                          | Negative              |
| Urine protein (g/L) <sup>(1)</sup> | Negative                     | Negative             | 0.75                        | Negative              |
| GFR (mL/min) <sup>(2)</sup>        | 50                           | 92                   | 73                          | 68                    |
| Known drugs used                   | Furosemide, $\beta$ -blocker | ARB, HCTZ            | Metformine, Glyburide, ACEi | ARB, HCTZ, Metformine |
| Hypertension (Y/N)                 | Yes                          | Yes                  | Yes                         | Yes                   |
| Diagnosis                          | Clear cell carcinoma         | Clear cell carcinoma | Clear cell carcinoma        | Oncocytoma            |

(3) Urine protein is determined on dipstick.

(4) GFR is calculated with MDRD equation.

SUPPLEMENTARY DATA

**Supplementary Figure 1. *HnRNP F* Overexpression Stimulates *Sirtuin-1*, but not *Foxo3a* and *p53* mRNA Expression in IRPTCs.** RT-qPCR of *hnRNP F* (A), *Sirtuin-1* (B), *Foxo3a* (C) and *p53* (D) in naïve IRPTCs, IRPTC-pcDNA 3.1 or IRPTC-pcDNA 3.1/*hnRNP F* stable transformants after 24-hr culture. Values, corrected to  $\beta$ -actin mRNA levels. \*\* $p < 0.01$ ; NS, not significant.

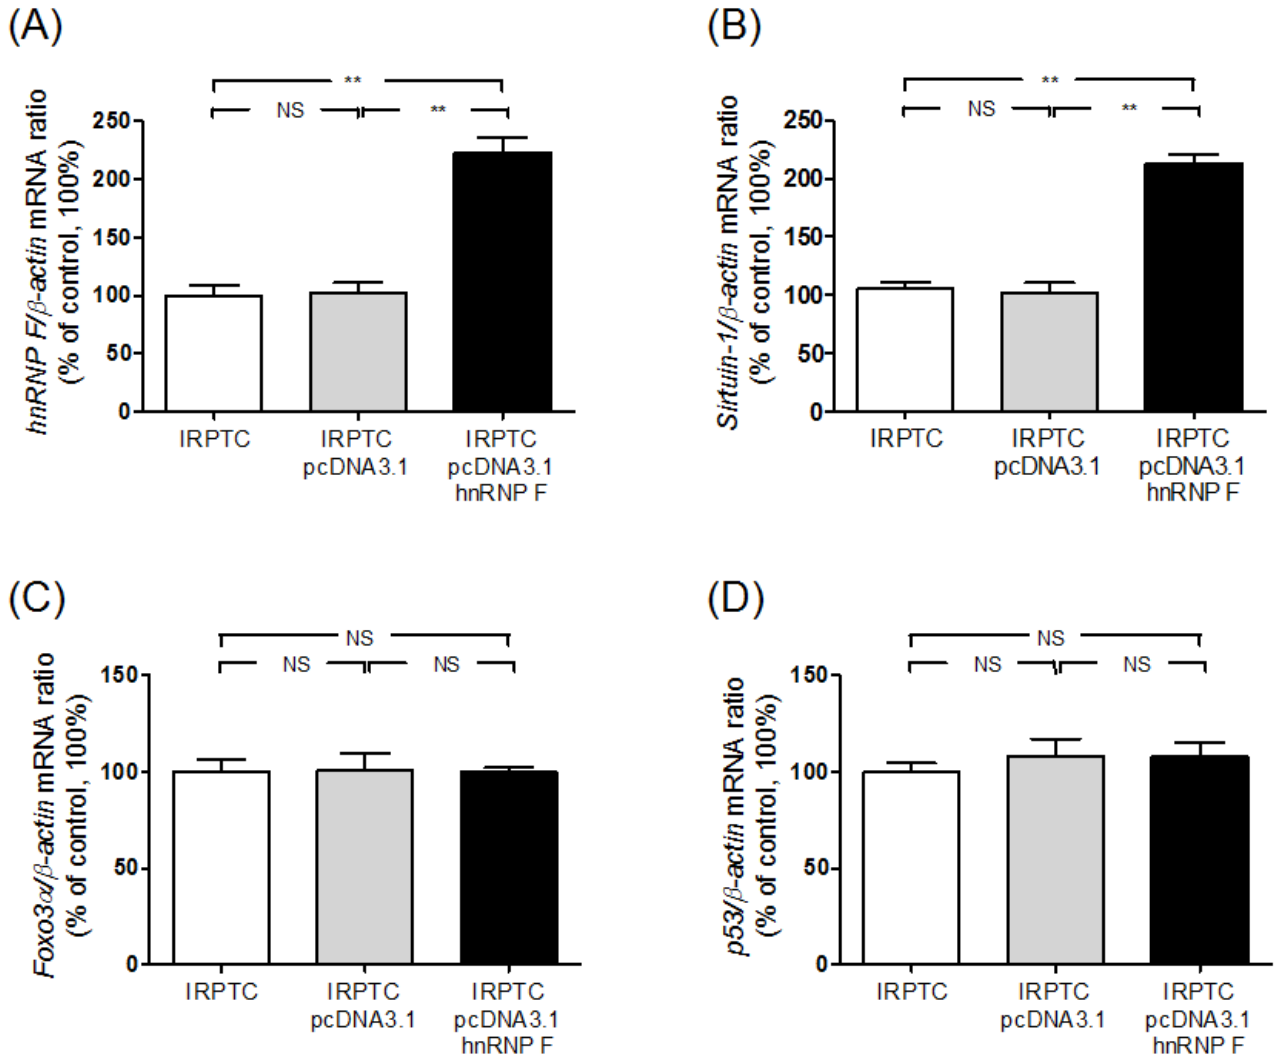

SUPPLEMENTARY DATA

**Supplementary Figure 2. Effect of *Sirtuin-1* siRNA, High Glucose and Palmitate on Sirtuin-1 Protein expression in IRPTCs.** (A) *Sirtuin-1* siRNA inhibits Sirtuin-1 protein expression in a concentration-dependent manner. (B) D-Glucose inhibits Sirtuin-1 expression in a concentration-dependent manner. (C) Palmitate inhibits Sirtuin-1 expression in a concentration-dependent manner. (D) Effect of high glucose with or without palmitate on Sirtuin-1 expression. Values, corrected to  $\beta$ -actin protein levels. \* $p < 0.05$ ; \*\* $p < 0.01$ ; NS, not significant.

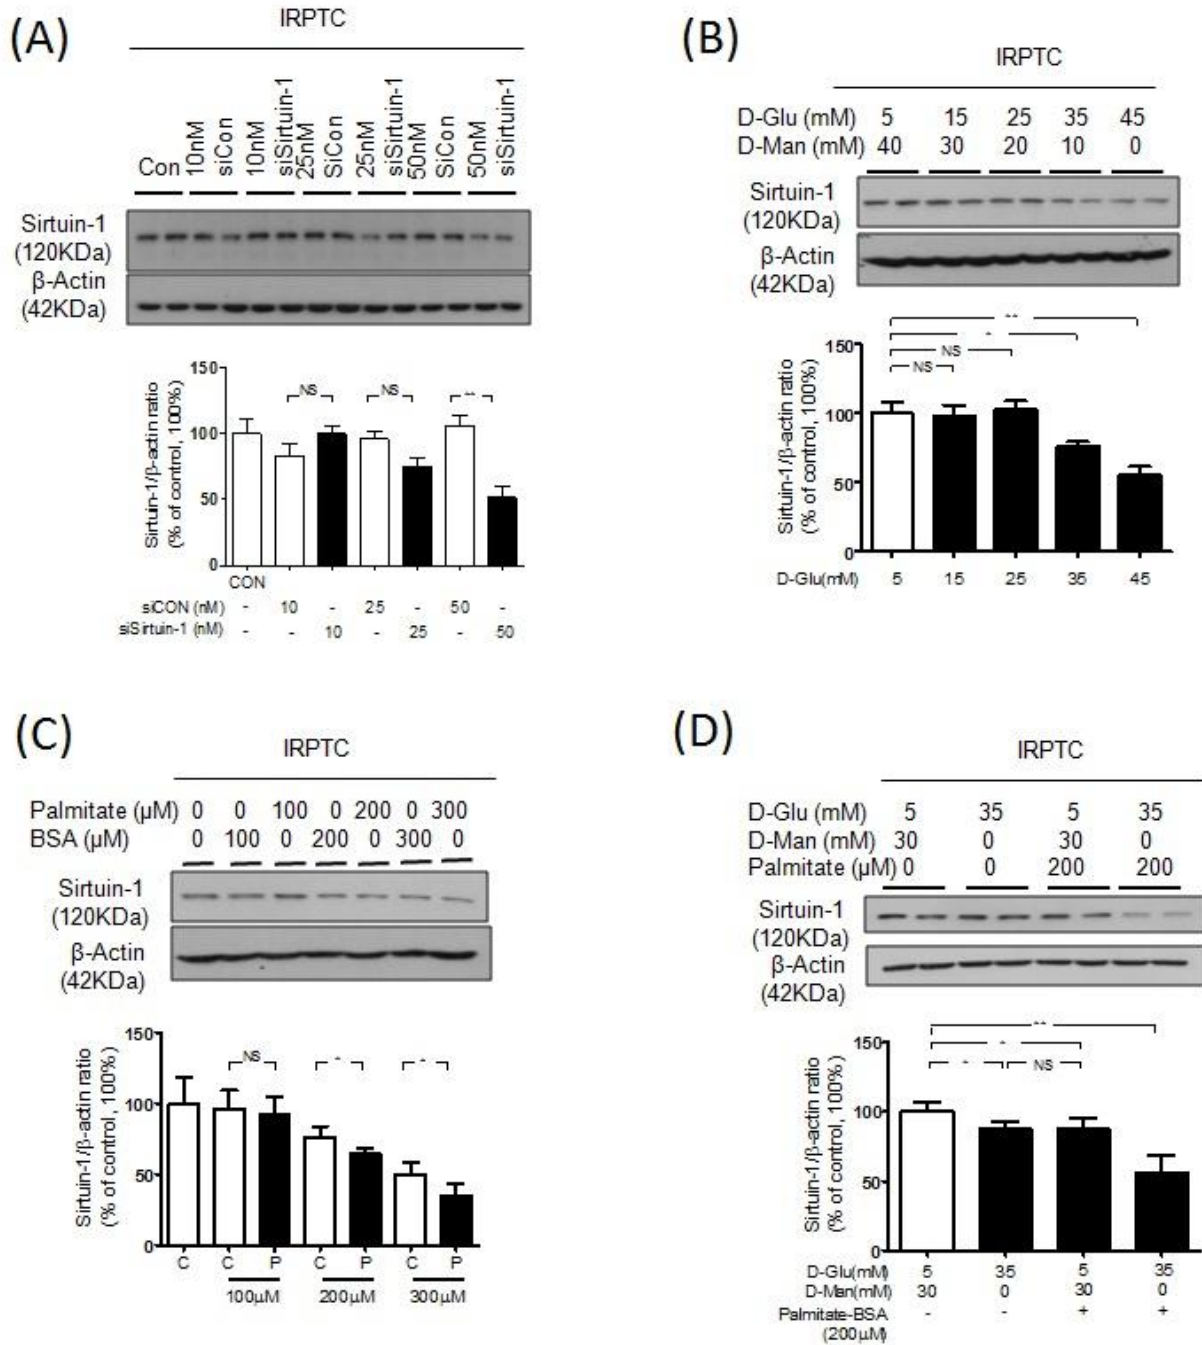



SUPPLEMENTARY DATA

**Supplementary Figure 3. RAS Gene Expression in Mouse Kidneys at Age 20 Weeks.** Immunostaining for Agt (A), ACE (B), Ace2 (C) and MasR (D) in kidney sections of db/m, db/m *hnRNP F-Tg*, db/db, and db/db *hnRNP F-Tg* mice. Magnification x200. WB of Agt (E), ACE (F), Ace2 (G) and MasR (H) and RT-qPCR of Agt (I), ACE (J), Ace2 (K) and MasR (L) mRNA in freshly-isolated RPTs from db/m, db/m *hnRNP F-Tg*, db/db and db/db *hnRNP F-Tg* mice. Values are means $\pm$ SEM, n=6. \* $p$ <0.05; \*\* $p$ <0.01; \*\*\* $p$ <0.005; NS, Not significant.

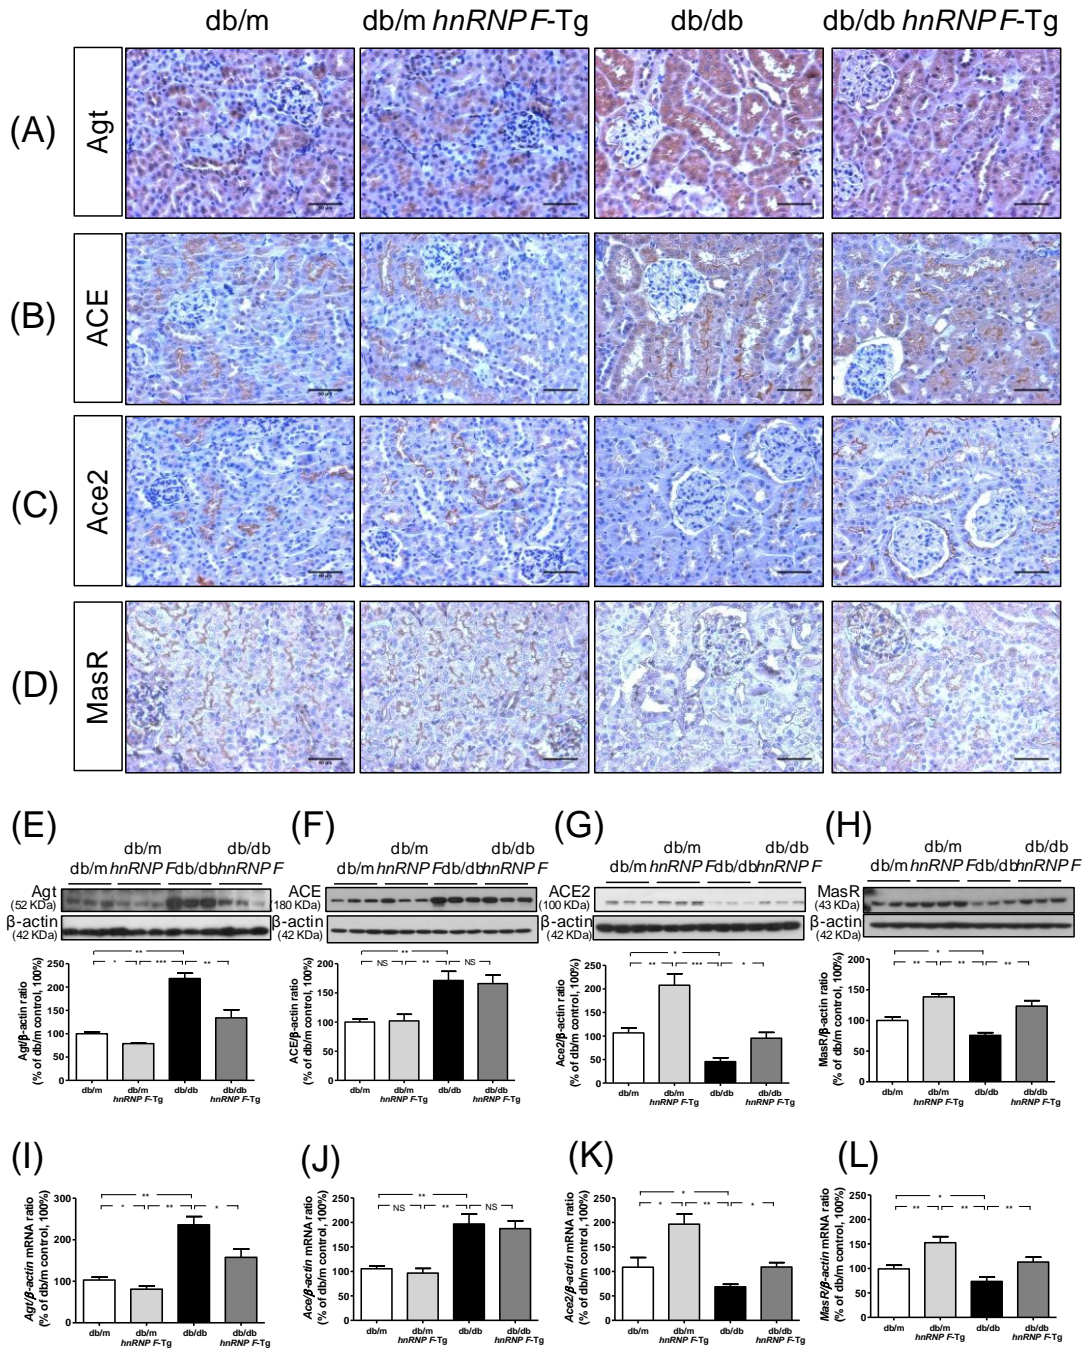



SUPPLEMENTARY DATA

**Supplementary Figure 4. Apoptosis and Gene Expression in Human Kidneys from Patients with or without Diabetes.** (A) TUNEL assay and DAPI staining. Arrows indicate cells that stained positive for TUNEL. Immunostaining of AGT (B), Ac-p53 (C), HnRNP F (D), SIRT1 (E) and FOXO3 $\alpha$  (F) in kidney sections from 2 non-diabetic cancer patients (a, patient with variant papillary carcinoma; b, patient with clear cell carcinoma) and 2 diabetic cancer patients (c, patient with variant papillary carcinoma; and d, patient with clear cell carcinoma. Magnification x200. G, glomerulus.

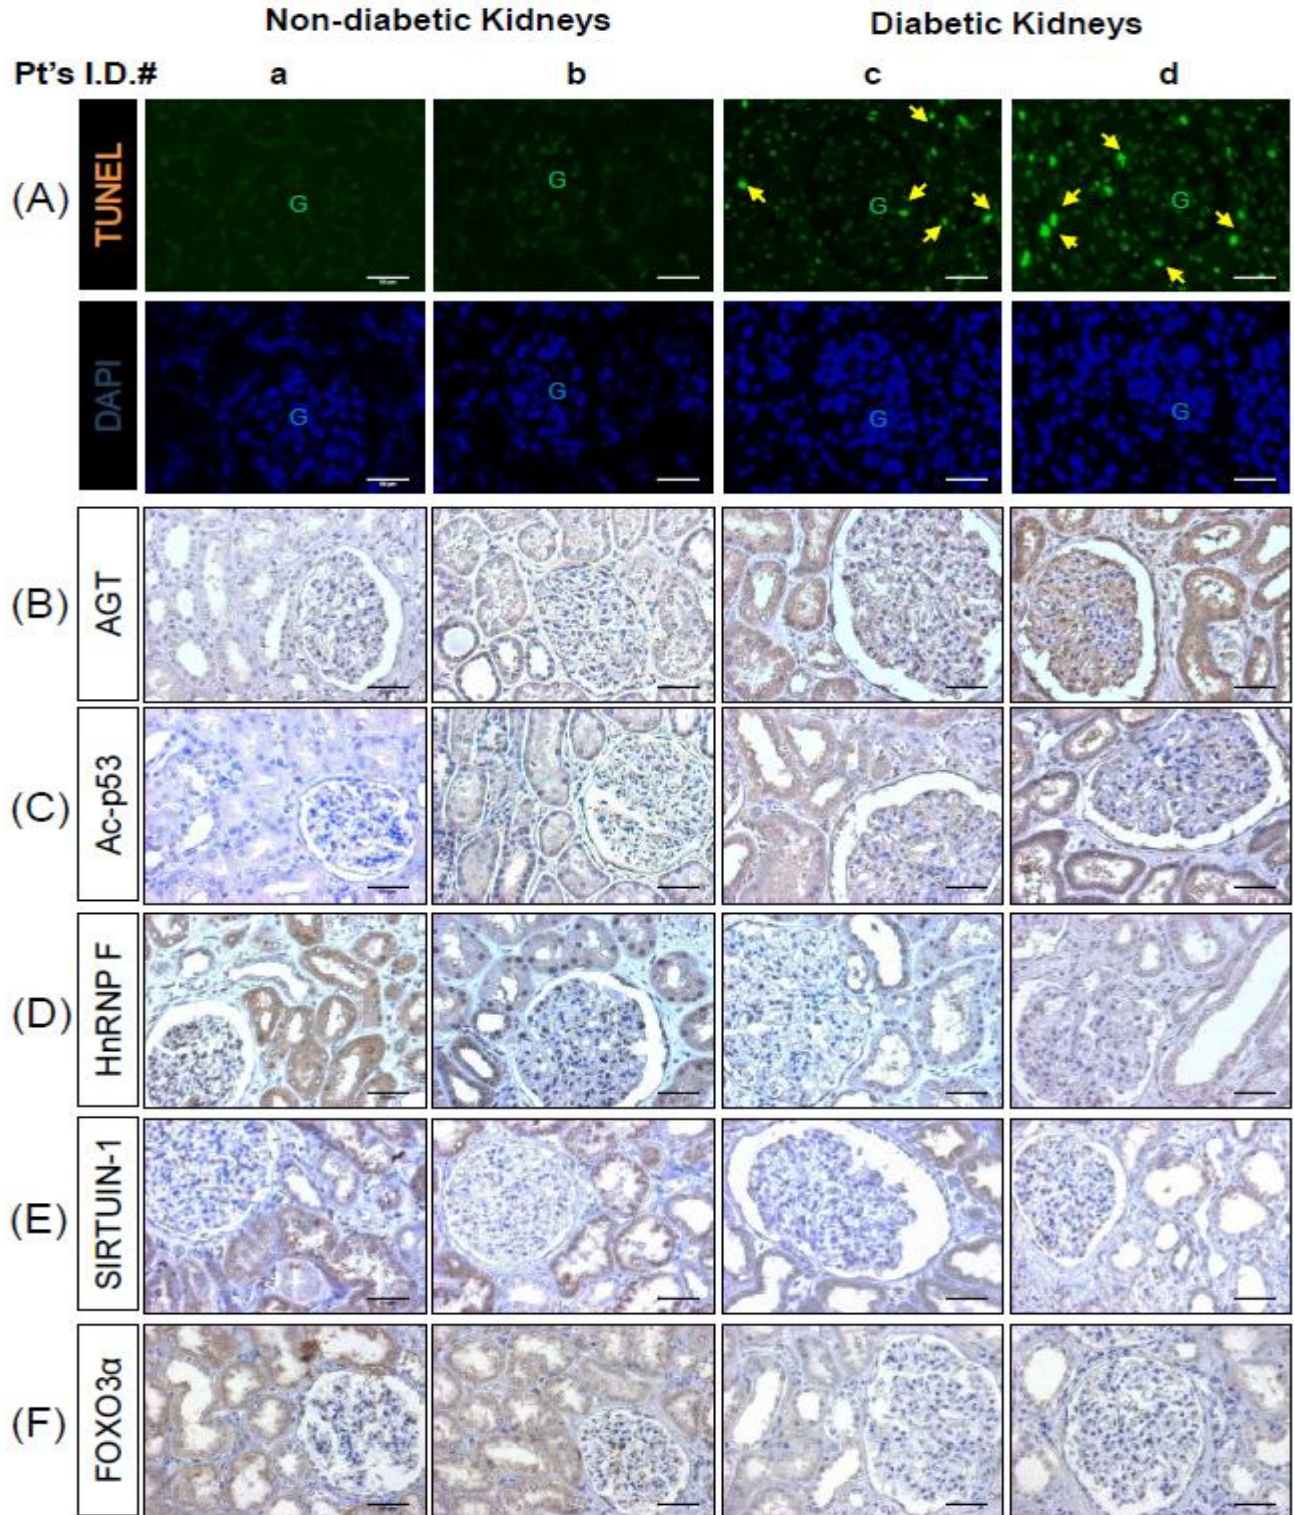

SUPPLEMENTARY DATA

**Supplementary Figure 5. Effect of *hnRNP F* siRNA on Gene Expression, Oxidative Stress and Cell Proliferation in IRPTCs.** RT-qPCR of *hnRNP F* (A), *Sirtuin-1* (B), *Foxo3a* (C), *p53* (D), *Agt* (E), oxidative stress (F), cell proliferation (G) and *hnRNP K* (H) with *hnRNP F* siRNA transfection in IRPTCs. \* $p < 0.05$ ; \*\* $p < 0.01$ ; \*\*\* $p < 0.005$ ; NS, Not significant.

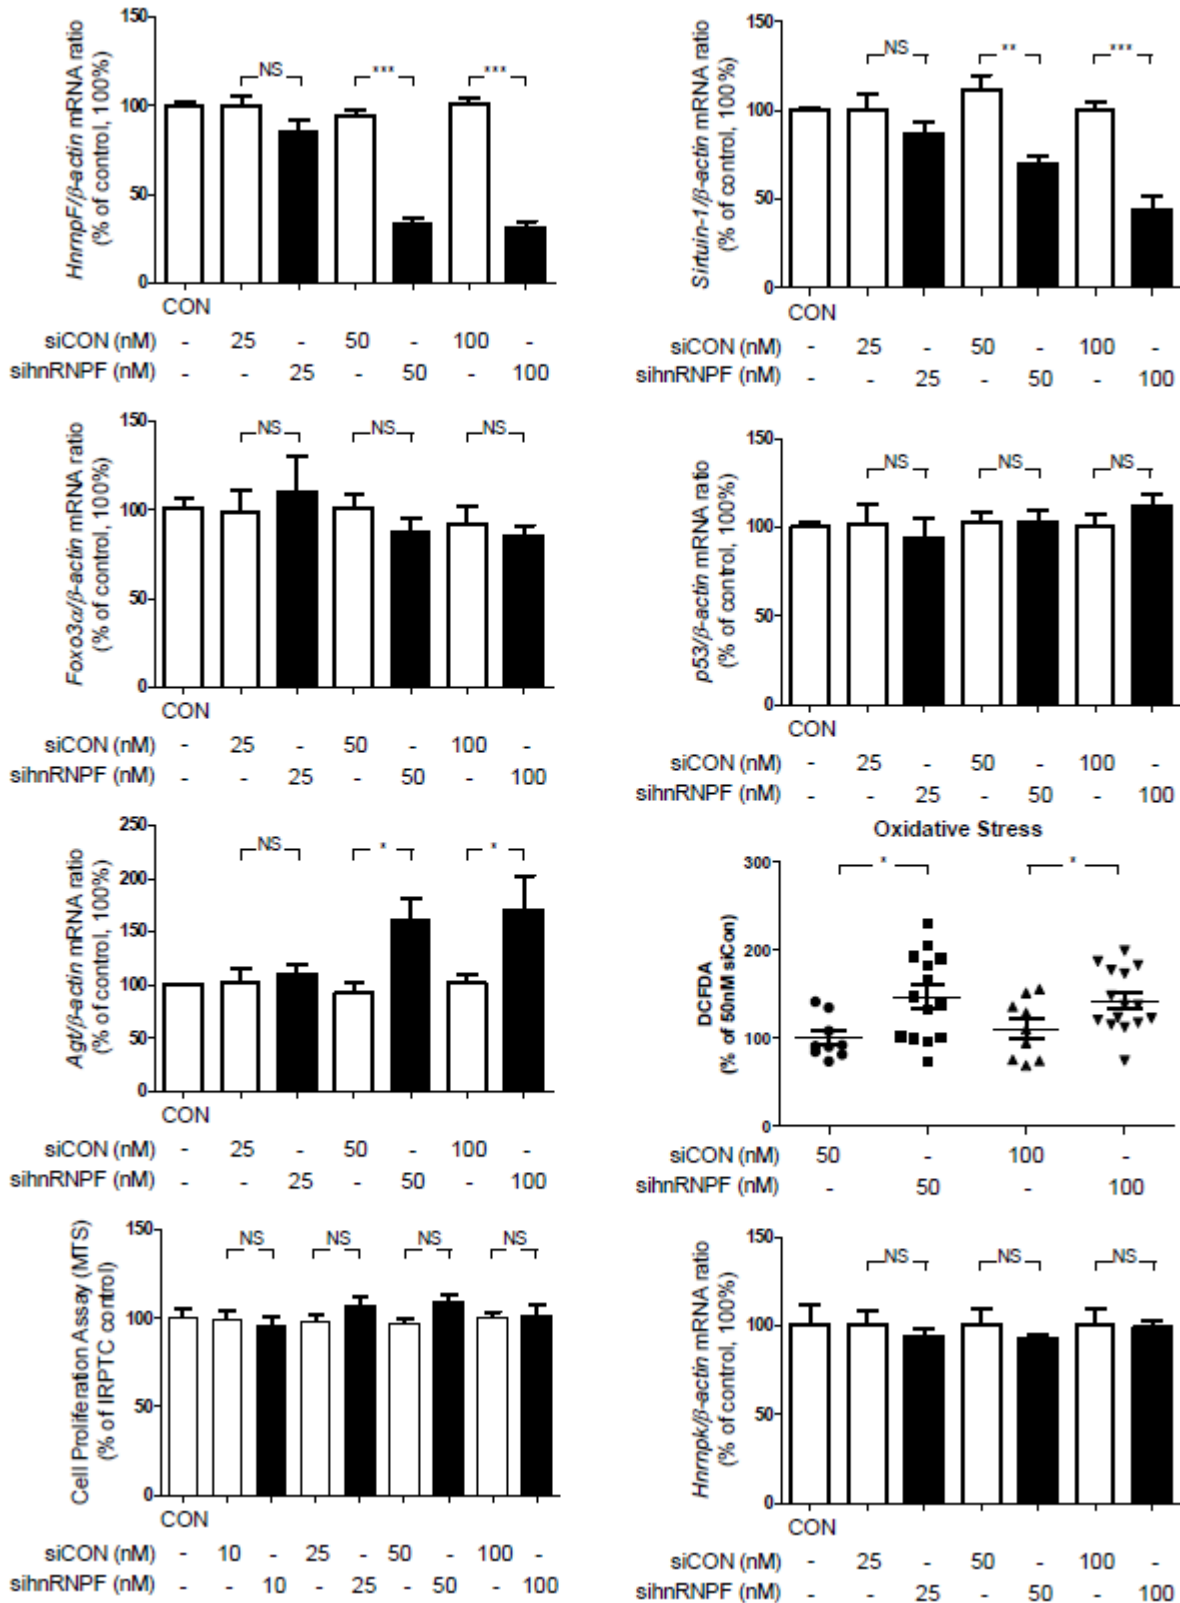

Supplement: DB161588SupplementaryData.pdf [file DB161588SupplementaryData.pdf]
